# Supplementary material for: Turning-on persistent luminescence out of chromium-doped zinc aluminate nanoparticles by instilling antisite defects under mild conditions
Source: Royal Society of Chemistry journal article supplement (doi:10.1039/d0nr08267h), 2021-01-01
Supplement: d0nr08267h1.pdf [file d0nr08267h1.pdf]

## Supplementary Information

# Turning-on Persistent Luminescence out of Chromium-Doped Zinc Aluminate Nanoparticles by Instilling Antisite Defect under Mild Conditions

Xiaodan Huang,<sup>a,b,†</sup> Xiaojun Wei,<sup>a,b,§,†</sup> Yan Zeng,<sup>b,c,†</sup> Lihong Jing,<sup>\*a</sup> Haoran Ning,<sup>a,b</sup>  
Xiaodan Sun,<sup>a,b</sup> Yingying Li,<sup>a,b</sup> Di Li,<sup>d</sup> Yuanping Yi,<sup>c</sup> and Mingyuan Gao<sup>\*a,b,e</sup>

<sup>a</sup>Key Laboratory of Colloid, Interface and Chemical Thermodynamics, Institute of Chemistry, Chinese Academy of Sciences, Bei Yi Jie 2, Zhong Guan Cun, Beijing 100190, China, <sup>b</sup>School of Chemistry and Chemical Engineering, University of Chinese Academy of Sciences, Beijing 100049, China, <sup>c</sup>Key Laboratory of Organic Solids, Institute of Chemistry, Chinese Academy of Sciences, 100190, Beijing, China, <sup>d</sup>State Key Laboratory of Luminescence and Applications Changchun Institute of Optics, Fine Mechanics and Physics Chinese Academy of Sciences, 3888 Eastern South Lake Road, Changchun 130033, P. R. China, <sup>e</sup>State Key Laboratory of Radiation Medicine and Protection, School for Radiological and Interdisciplinary Sciences, Collaborative Innovation Center of Radiation Medicine of Jiangsu Higher Education Institutions, Soochow University, Suzhou 215123, China

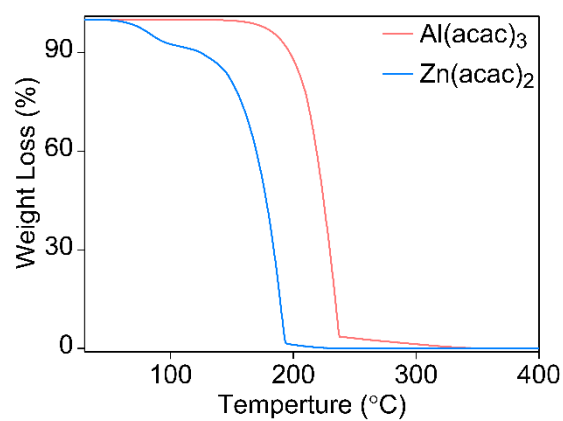

**Fig S1.** Thermal gravity curves of  $\text{Al}(\text{acac})_3$  and  $\text{Zn}(\text{acac})_3$ .

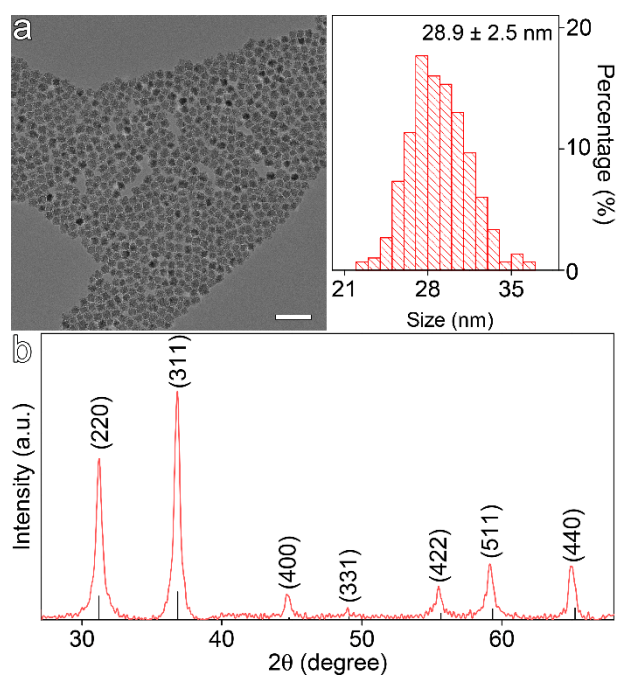

**Fig S2.** TEM image together with the corresponding particle size histogram of ZAC-5 nanoparticles prepared through a seed-mediated growth (the embedded scale bars correspond to 100 nm).

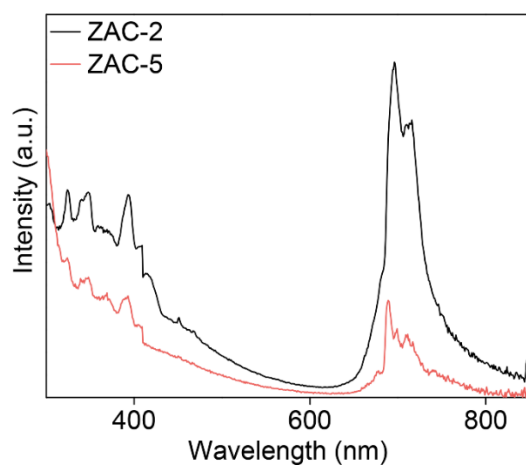

**Fig S3.** Photoluminescence spectra of ZAC-2 and ZAC-5 recorded under excitation at 254 nm with a Xe lamp.

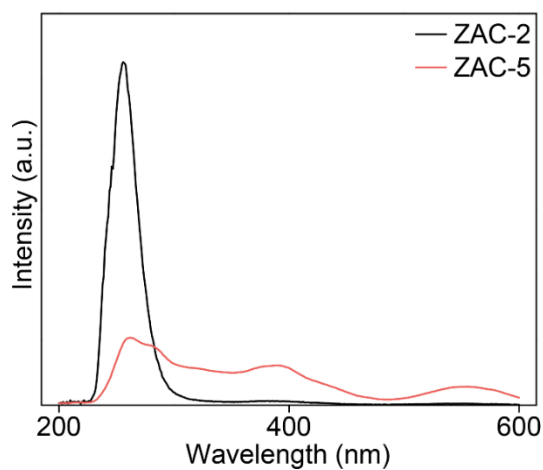

**Fig S4.** Fluorescence excitation spectra of ZAC-2 and ZAC-5 recorded under excitation at 254 nm with a Xe lamp.

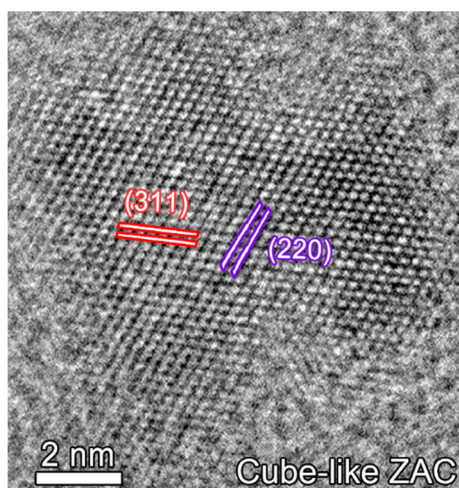

**Fig S5.** HRTEM image of ZAC-3 cube-like nanoparticles.

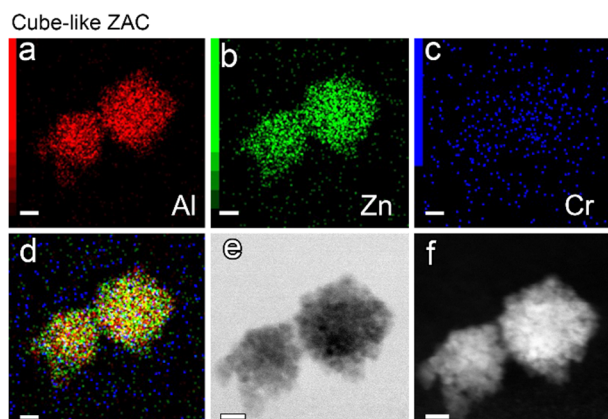

**Fig S6.** STEM-EDS elemental mapping of ZAC-5 nanoparticles (the embedded scale bars correspond to 10 nm).

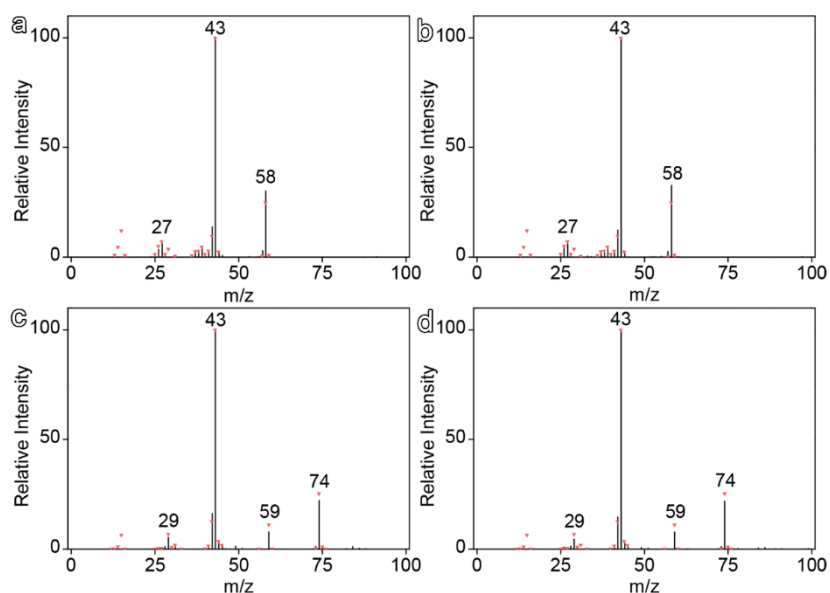

**Fig S7.** Mass spectra of the species collected at retention time of 1.45 min and 1.53 min, respectively, formed by methanol promoted decomposition of  $\text{Zn}(\text{acac})_2$  and  $\text{Al}(\text{acac})_3$ .

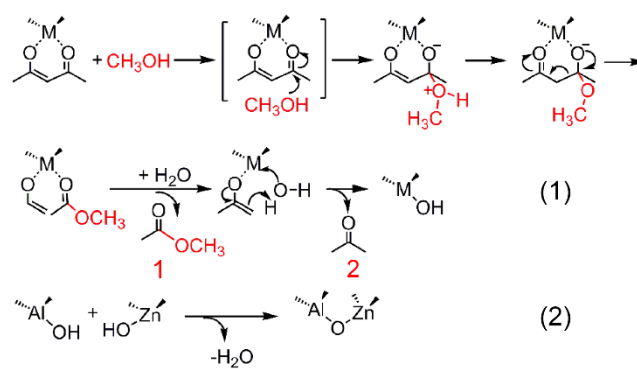

**Fig S8.** Mechanism of Al-O-Zn bond formation catalyzed by MeOH.

**Table S1.** The parameters for multi-exponentially fitting the decay curves in **Figure 2b**, *i.e.*, the normalized amplitude  $B_i$ , time constant  $\tau_i$ , and their normalized products  $f_i$ .<sup>‡</sup>

| Sample | $B_1$<br>[%] | $f_1$<br>[%] | $\tau_1$<br>[s] | $B_2$<br>[%] | $f_2$<br>[%] | $\tau_2$<br>[s] | $B_3$<br>[%] | $f_3$<br>[%] | $\tau_3$<br>[s] | $B_4$<br>[%] | $f_4$<br>[%] | $\tau_4$<br>[s] | $\tau_{avg}$<br>[s] |
|--------|--------------|--------------|-----------------|--------------|--------------|-----------------|--------------|--------------|-----------------|--------------|--------------|-----------------|---------------------|
| ZAC-1  | 11.05        | 0.081        | 1.0             | 26.12        | 1.61         | 8.5             | 26.61        | 10.88        | 56.0            | 36.22        | 87.42        | 330.7           | 295.4               |
| ZAC-2  | 27.9         | 0.78         | 3.2             | 31.45        | 8.8          | 31.8            | 40.65        | 90.40        | 252.5           |              |              |                 | 231.1               |

<sup>‡</sup>The PL decay curves were fitted using a multi - exponential function:

$$I(t) = \sum_{i=1}^n B_i \exp(-t/\tau_i), \quad \sum_{i=1}^n B_i = 1$$

In this expression,  $\tau_i$  represents the decay time constants, and  $B_i$  represents the normalized amplitude of each components,  $n$  is the number of decay times. Because the photoluminescence decays for most of the samples are best fitted using a three - /four - exponential model ( $n = 3/4$ ), the amplitude weighted average decay lifetime ( $\tau_{avg}$ ) of the entire PL decay process was calculated with the following equation:

$$\tau_{avg} = \frac{\sum B_i \tau_i^2}{\sum B_i \tau_i}$$

**Table S2.** Texture coefficients (TC) of ZAC-1 and ZAC-2 nanoparticles calculated based on the XRD diffraction peak positions.

|       | <i>(hkl)</i> | TC   |
|-------|--------------|------|
| ZAC-1 | (220)        | 1.05 |
|       | (311)        | 1.26 |
| ZAC-2 | (220)        | 1.11 |
|       | (311)        | 1.31 |
